# Supplementary material for: Transplant outcomes in positive complement-dependent cytotoxicity- versus flow cytometry-crossmatch kidney transplant recipients after successful desensitization: a retrospective study
Source: PubMed Central journal article supplement (PMC6902609; doi:10.1186/s12882-019-1625-2), 2019-12-09

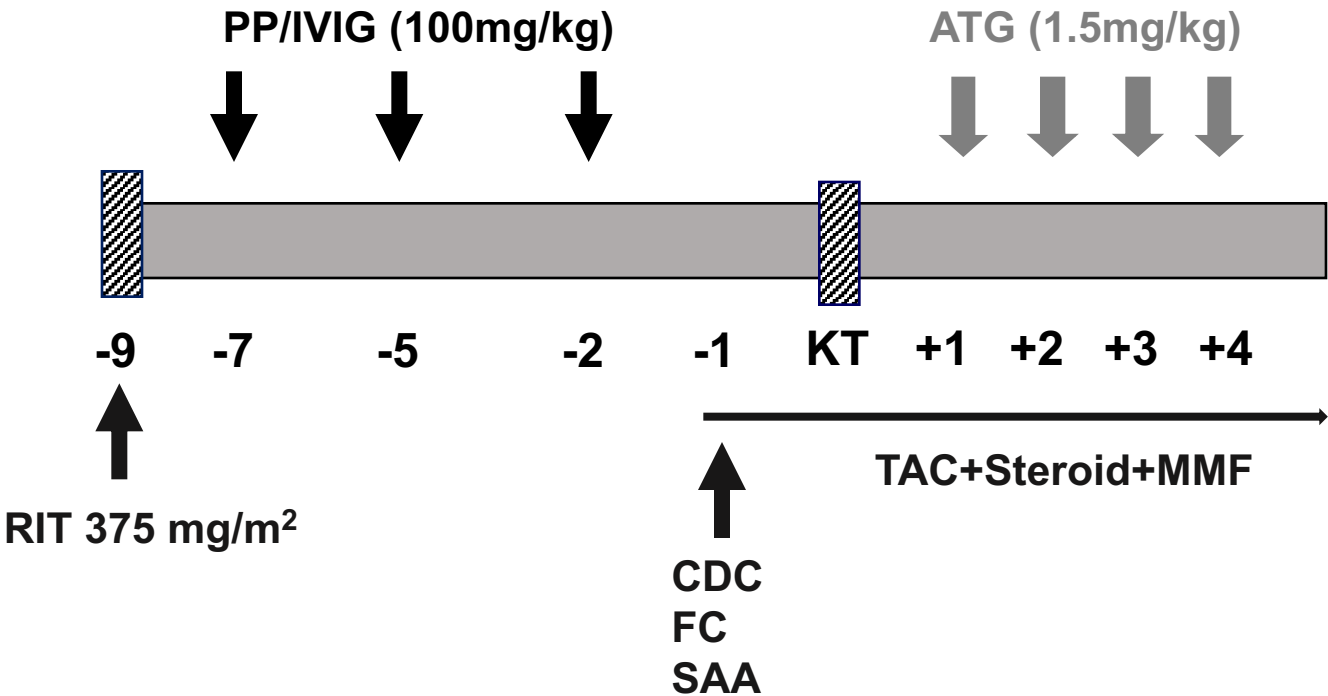

Supplement: 12882_2019_1625_MOESM1_ESM.pdf [file 12882_2019_1625_MOESM1_ESM.pdf]
