# Supplementary material for: Transplant outcomes in positive complement-dependent cytotoxicity- versus flow cytometry-crossmatch kidney transplant recipients after successful desensitization: a retrospective study
Source: PubMed Central journal article supplement (PMC6902609; doi:10.1186/s12882-019-1625-2), 2019-12-09
Supplement: 12882_2019_1625_MOESM2_ESM.pdf [file 12882_2019_1625_MOESM2_ESM.pdf]

**PP/IVIG (100mg/kg) (6-10 times)**

**ATG (1.5mg/kg)**

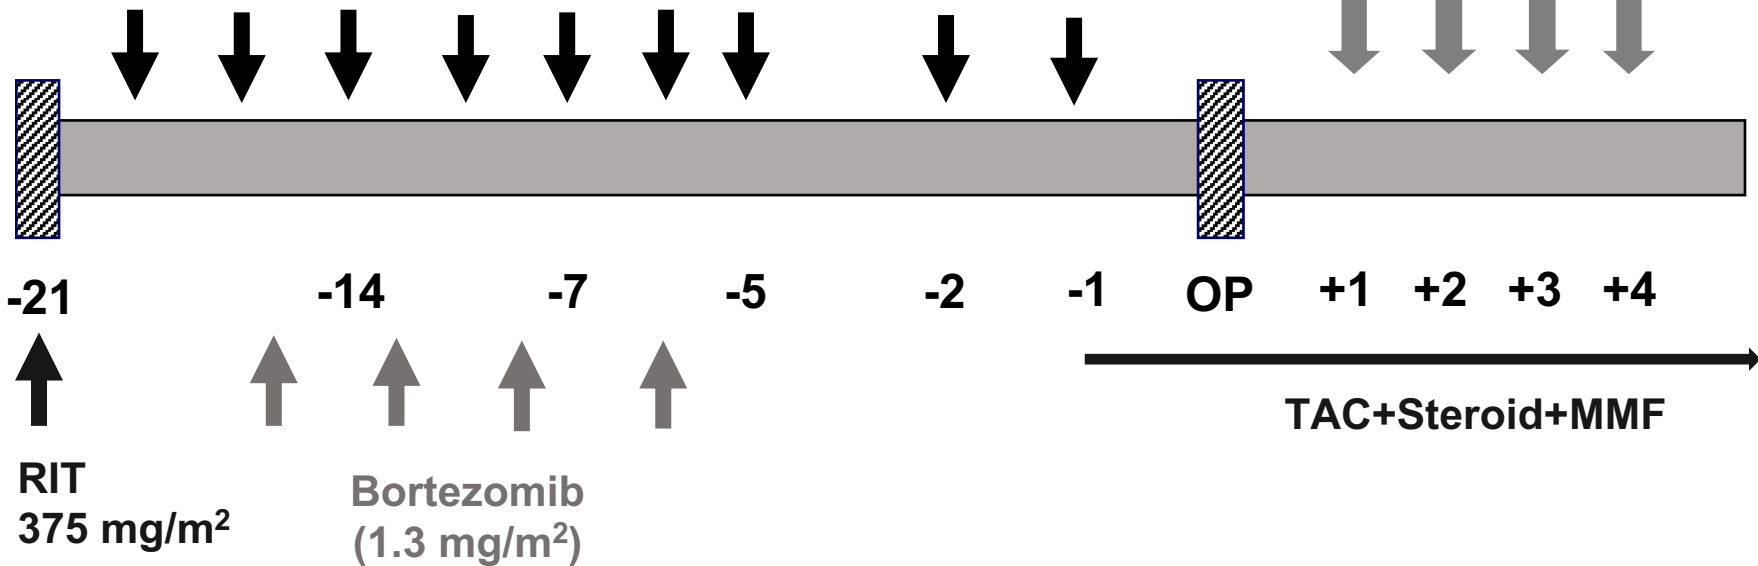

\* SAA, C1q: -14, -7, -2 day

\* CDC, FC: -2 day
